# Supplementary material
Source: HighWire-hosted journal article supplement (https://www.cmajopen.ca/content/suppl/2020/05/23/8.2.E391)
Supplement: 2019-0089-1-at.pdf [file 2019-0089-1-at.pdf]

**Appendix 1 (as supplied by the authors): Supplemental tables**

| <b>Supplemental Table S1: Variables and definitions</b>                         |                               |                                                                                                                                                                                            |
|---------------------------------------------------------------------------------|-------------------------------|--------------------------------------------------------------------------------------------------------------------------------------------------------------------------------------------|
| <b>Variable</b>                                                                 | <b>Data Source</b>            | <b>Definition Description and/or Dx/fee Codes</b>                                                                                                                                          |
| <b>Age</b>                                                                      | RPDB<br>PCPOP                 | Age of the individual at the index date                                                                                                                                                    |
| <b>Sex</b>                                                                      | RPDB                          | Sex of individual                                                                                                                                                                          |
| <b>History of substance use related care</b>                                    | DAD<br>NACRS<br>OMHRS<br>OHIP | 1 hospitalization or 2 claims in 2 years or less of any code in variable “Substance use disorder”                                                                                          |
| <b>History of mental health related care</b>                                    | DAD<br>NACRS<br>OMHRS<br>OHIP | 1 hospitalization OR 2 claims in 2 years or less of any code in variable “Psychotic disorder” or “Non-psychotic” or “Other mental health”                                                  |
| <b>Priority Population CHC (PPCHC) and Non-priority Population CHC (NPPCHC)</b> | CHC                           | Presented to a CHC, between 1 April 2014 and 31 March 2015; two subgroups, PPCHC and NPPCHC, developed with CHCV geographic identifier variable.                                           |
| <b>Ontario</b>                                                                  | PCPOP                         | In ICES-derived Primary Care Population dataset, alive as of 1 April 2014                                                                                                                  |
| <b>Income quintile</b>                                                          | RPDB<br>PCPOP                 | Neighbourhood income quintile                                                                                                                                                              |
| <b>Residential Instability</b>                                                  | ONMarg                        | Area-level concentrations of people who experience high rates of family or housing instability                                                                                             |
| <b>Material Deprivation</b>                                                     | ONMarg                        | A combined measure of income, quality of housing, educational attainment, and family structure characteristics                                                                             |
| <b>Dependency</b>                                                               | ONMarg                        | Area-level concentrations of people who do not have income from employment                                                                                                                 |
| <b>Ethnic Concentration</b>                                                     | ONMarg                        | Concentrations of recent immigrants and people belonging to a ‘visible minority’ group                                                                                                     |
| <b>Recent Immigrant Status</b>                                                  | IRCC (CIC)                    | Presence in IRCC database with landing date less than 10 years before index date                                                                                                           |
| <b>Rural status</b>                                                             | RPDB                          | Resides in a rural area as defined as a settlement of <10,000 individuals                                                                                                                  |
| <b>Rostered to a Family Physician at index</b>                                  | CAPE                          | Rostering to a family physician practice                                                                                                                                                   |
| <b>Psychotic disorder</b>                                                       | DAD<br>NACRS<br>OMHRS<br>OHIP | ICD-10: F20, F22, F23, F24, F25, F28, F29, F323, F333;<br>OHIP: 295, 297, 298, 295, 296, 297, 298                                                                                          |
| <b>Non-psychotic disorder</b>                                                   | DAD<br>NACRS<br>OMHRS<br>OHIP | ICD-10: F21, F30, F31, F321, F322, F328, F330, F331, F332, F334, F338, F339, F348, F349, F380, F381, F388, F39, F40, F41, F42, F43, F48, F60, F93; OHIP: 296, 300, 301, 302, 306, 309, 311 |

| <b>Supplemental Table S1: Variables and definitions</b> |                               |                                                                                                                                                                                                                                                                                                                             |
|---------------------------------------------------------|-------------------------------|-----------------------------------------------------------------------------------------------------------------------------------------------------------------------------------------------------------------------------------------------------------------------------------------------------------------------------|
| <b>Variable</b>                                         | <b>Data Source</b>            | <b>Definition Description and/or Dx/fee Codes</b>                                                                                                                                                                                                                                                                           |
| <b>Substance use disorder</b>                           | DAD<br>NACRS<br>OMHRS<br>OHIP | ICD-10: F10, F11, F12, F13, F14, F15, F16, F17, F18, F19, F55, E244, G312, G620, G621, G720, G721, I426, I427, K292, K70, K852, K853, K860, T51, X45, Z502, Z503; OHIP: 291, 292, 303, 304, 305, A680, C680, K680, K682, K683, K684, K701                                                                                   |
| <b>Other mental health</b>                              | DAD<br>NACRS<br>OMHRS<br>OHIP | ICD-10: F44, F45, F50, F5, F52, F53, F54, F55, F59, F61, F62, F63, F64, F65, F66, F68, F69, F70, F71, F72, F73, F78, F79, F80, F81, F82, F83, F84, F88, F89, F90, F91, F92, F94, F95, F98, F99, X60, X61, X62, X63, X64, X65, X66, X67, X68, X69, X70, X71, X72, X73, X74, X75, X76, X77, X78, X79, X80, X81, X82, X83, X84 |
| <b>Asthma</b>                                           | PCPOP<br>ASTHMA               | Presence in the database indicates the individual has a history of asthma                                                                                                                                                                                                                                                   |
| <b>COPD</b>                                             | PCPOP<br>COPD                 | Presence in the database indicates the individual has a history of COPD                                                                                                                                                                                                                                                     |
| <b>Diabetes</b>                                         | PCPOP<br>ODD                  | Presence in the database indicates the individual has a history of diabetes                                                                                                                                                                                                                                                 |
| <b>Hypertension</b>                                     | PCPOP<br>HYPER                | Presence in the database indicates the individual has a history of hypertension                                                                                                                                                                                                                                             |
| <b>Infective Endocarditis</b>                           | DAD                           | ICD-10: I330, I339                                                                                                                                                                                                                                                                                                          |
| <b>Rheumatoid Arthritis</b>                             | ORAD                          | Presence in the database indicates the individual has a history of rheumatoid arthritis                                                                                                                                                                                                                                     |
| <b>Congestive heart failure</b>                         | CHF                           | Presence in the database indicates the individual has a history of congestive heart failure                                                                                                                                                                                                                                 |
| <b>Chronic Liver Disease</b>                            | DAD<br>NACRS                  | ICD-10: B16, B17, B18, B19, I85, R17, R18, R160, R162, B942, Z225, E831, E830, K70, K713, K714, K715, K717, K721, K729, K73, K74, K753, K754, K758, K759, K76, K77; OHIP: 571, 573, 070, Z551, Z554                                                                                                                         |
| <b>Chronic Kidney Disease</b>                           | DAD<br>NACRS                  | ICD-10: E102, E112, E132, E142, I12, I13, N00, N01, N02, N03, N04, N05, N06, N07, N08, N10, N11, N12, N13, N14, N15, N16, N17, N18, N19, N20, N21, N22, N23; OHIP: 403, 585                                                                                                                                                 |
| <b>Crohn's Ulcerative Colitis</b>                       | OCCC                          | Presence in the database indicates the individual has a history of Crohn's / Ulcerative Colitis                                                                                                                                                                                                                             |
| <b>HIV</b>                                              | HIV                           | Presence in the database indicates the individual has a history of HIV                                                                                                                                                                                                                                                      |
| <b>Skin and Soft Tissue Infection</b>                   | DAD<br>SDS<br>NACRS<br>OHIP   | ICD-10: A46, B86, H00, H031, H600, H601, H602, H603, H620, H622, H623, H66, J340, J340, K122, K61, L00, L01, L02, L03, L04, L05, L08; OHIP: 035, 680, 682, 683, 684, 685, 686                                                                                                                                               |
| <b>Chronic Pain</b>                                     | DAD<br>SDS<br>NACRS<br>OHIP   | ICD-10: F454, M081, M2550, M2551, M2555, M2556, M2557, M432, M433, M434, M435, M436, M45, M461, M463, M464, M469, M47, M480, M481, M488, M489, M508, M509, M51, M531, M532, M533, M538, M539, M54, M608, M609, M633, M790, M791, M792, M796, M797, M961; OHIP: 720, 721, 722, 724, 729                                      |

| <b>Supplemental Table S1: Variables and definitions</b>                                                                   |                    |                                                                                                                                                                                                                                                                                                                    |
|---------------------------------------------------------------------------------------------------------------------------|--------------------|--------------------------------------------------------------------------------------------------------------------------------------------------------------------------------------------------------------------------------------------------------------------------------------------------------------------|
| <b>Variable</b>                                                                                                           | <b>Data Source</b> | <b>Definition Description and/or Dx/fee Codes</b>                                                                                                                                                                                                                                                                  |
| <b>Primary healthcare visits*</b>                                                                                         | OHIP<br>CHC        | Number of physician visits within 1 year after to the index date, defined as one visit per day per physician                                                                                                                                                                                                       |
| <b>Emergency department visits*</b>                                                                                       | PCPOP<br>NACRS     | Number of ED visits within 1 year after to the index date                                                                                                                                                                                                                                                          |
| <b>Hospitalizations*</b>                                                                                                  | DAD                | Number of admissions to acute care hospitals within 1 year after to the index date                                                                                                                                                                                                                                 |
| <b>Specialist visit *</b><br><b>Psychiatrist</b><br><b>Respirologist</b><br><b>Endocrinologist</b><br><b>Cardiologist</b> | PCPOP<br>OHIP      | Number of specialist visits within 1 year prior to the index date, defined as one visit per day per physician; PCPOP: SV_CARDIO = cardiologist, SV_ENDO = endocrinologist, SV_RESP=respirologist, SV_PSYCH=psychiatrist; OHIP: 2113 (Psychiatrist), 260 (Respirologist), 187 (Endocrinologist), 606 (Cardiologist) |
| *study outcome variable                                                                                                   |                    |                                                                                                                                                                                                                                                                                                                    |

| <b>Supplemental Table S2: Adjusted odds ratio of all covariates during follow-up period</b> |                                                                                      |                                                                                                |
|---------------------------------------------------------------------------------------------|--------------------------------------------------------------------------------------|------------------------------------------------------------------------------------------------|
|                                                                                             | <b>Adjusted odds ratio of psychiatric care during follow-up (1 year)<sup>1</sup></b> | <b>Adjusted odds ratio of emergency department visit during follow-up (1 year)<sup>2</sup></b> |
| Age at cohort entry, per year increase                                                      | 0.99 (0.99-0.99)                                                                     | 1.00 (0.99-1.00)                                                                               |
| Sex (reference=female)                                                                      | 1.03 (1.02-1.04)                                                                     | 0.92 (0.92-0.92)                                                                               |
| Income Quintile (reference=Quintile 1)                                                      |                                                                                      |                                                                                                |
| Quintile 2                                                                                  | 0.97 (0.96-0.98)                                                                     | 1.01 (1.00-1.02)                                                                               |
| Quintile 3                                                                                  | 0.99 (0.98-1.00)                                                                     | 1.00 (1.00-1.01)                                                                               |
| Quintile 4                                                                                  | 0.99 (0.98-1.00)                                                                     | 0.99 (0.98-1.00)                                                                               |
| Quintile 5 (highest)                                                                        | 1.07 (1.06-1.09)                                                                     | 0.95 (0.94-0.96)                                                                               |
| Residential Instability (reference=Quintile 1)                                              |                                                                                      |                                                                                                |
| Quintile 2                                                                                  | 0.96 (0.95-0.97)                                                                     | 0.99 (0.98-1.00)                                                                               |
| Quintile 3                                                                                  | 0.99 (0.98-1.00)                                                                     | 1.00 (0.99-1.01)                                                                               |
| Quintile 4                                                                                  | 1.03 (1.02-1.04)                                                                     | 1.01 (1.01-1.02)                                                                               |
| Quintile 5 (most)                                                                           | 1.09 (1.08-1.10)                                                                     | 1.03 (1.03-1.04)                                                                               |
| Material Deprivation (reference=Quintile 1)                                                 |                                                                                      |                                                                                                |
| Quintile 2                                                                                  | 0.98 (0.97-0.99)                                                                     | 0.96 (0.95-0.97)                                                                               |
| Quintile 3                                                                                  | 1.00 (0.99-1.01)                                                                     | 0.99 (0.99-1.00)                                                                               |
| Quintile 4                                                                                  | 1.00 (0.99-1.01)                                                                     | 1.04 (1.03-1.05)                                                                               |
| Quintile 5 (most)                                                                           | 1.03 (1.02-1.04)                                                                     | 1.11 (1.10-1.12)                                                                               |
| Dependency (reference=Quintile 1)                                                           |                                                                                      |                                                                                                |
| Quintile 2                                                                                  | 1.00 (0.97-0.99)                                                                     | 0.97 (0.97-0.98)                                                                               |
| Quintile 3                                                                                  | 1.02 (0.99-1.01)                                                                     | 1.00 (0.99-1.01)                                                                               |
| Quintile 4                                                                                  | 1.01 (1.00-1.02)                                                                     | 1.02 (1.01-1.03)                                                                               |

|                                                                                                                                                                                                                                                                                                                                                                                                                                                                                                                                                                                                                                                                                                                                                                                                                                                                                                                                                                                                                                                                                                                                                                                                                                                                                                                                                                                                                                                                                                                                                                                                                                                                                                                                                                                                        |                  |                  |
|--------------------------------------------------------------------------------------------------------------------------------------------------------------------------------------------------------------------------------------------------------------------------------------------------------------------------------------------------------------------------------------------------------------------------------------------------------------------------------------------------------------------------------------------------------------------------------------------------------------------------------------------------------------------------------------------------------------------------------------------------------------------------------------------------------------------------------------------------------------------------------------------------------------------------------------------------------------------------------------------------------------------------------------------------------------------------------------------------------------------------------------------------------------------------------------------------------------------------------------------------------------------------------------------------------------------------------------------------------------------------------------------------------------------------------------------------------------------------------------------------------------------------------------------------------------------------------------------------------------------------------------------------------------------------------------------------------------------------------------------------------------------------------------------------------|------------------|------------------|
| Quintile 5 (most)                                                                                                                                                                                                                                                                                                                                                                                                                                                                                                                                                                                                                                                                                                                                                                                                                                                                                                                                                                                                                                                                                                                                                                                                                                                                                                                                                                                                                                                                                                                                                                                                                                                                                                                                                                                      | 0.99 (0.98-1.00) | 1.03 (1.03-1.04) |
| Ethnic Concentration (reference=Quintile 1)                                                                                                                                                                                                                                                                                                                                                                                                                                                                                                                                                                                                                                                                                                                                                                                                                                                                                                                                                                                                                                                                                                                                                                                                                                                                                                                                                                                                                                                                                                                                                                                                                                                                                                                                                            |                  |                  |
| Quintile 2                                                                                                                                                                                                                                                                                                                                                                                                                                                                                                                                                                                                                                                                                                                                                                                                                                                                                                                                                                                                                                                                                                                                                                                                                                                                                                                                                                                                                                                                                                                                                                                                                                                                                                                                                                                             | 0.96 (0.95-0.97) | 1.05 (1.04-1.06) |
| Quintile 3                                                                                                                                                                                                                                                                                                                                                                                                                                                                                                                                                                                                                                                                                                                                                                                                                                                                                                                                                                                                                                                                                                                                                                                                                                                                                                                                                                                                                                                                                                                                                                                                                                                                                                                                                                                             | 1.01 (1.00-1.01) | 1.01 (1.00-1.01) |
| Quintile 4                                                                                                                                                                                                                                                                                                                                                                                                                                                                                                                                                                                                                                                                                                                                                                                                                                                                                                                                                                                                                                                                                                                                                                                                                                                                                                                                                                                                                                                                                                                                                                                                                                                                                                                                                                                             | 1.06 (1.05-1.07) | 0.96 (0.95-0.97) |
| Quintile 5 (most)                                                                                                                                                                                                                                                                                                                                                                                                                                                                                                                                                                                                                                                                                                                                                                                                                                                                                                                                                                                                                                                                                                                                                                                                                                                                                                                                                                                                                                                                                                                                                                                                                                                                                                                                                                                      | 1.05 (1.03-1.06) | 0.93 (0.92-0.93) |
| Recent Immigrant Status (reference='no')                                                                                                                                                                                                                                                                                                                                                                                                                                                                                                                                                                                                                                                                                                                                                                                                                                                                                                                                                                                                                                                                                                                                                                                                                                                                                                                                                                                                                                                                                                                                                                                                                                                                                                                                                               | 0.88 (0.86-0.89) | 0.95 (0.94-0.96) |
| Rural (reference='urban')                                                                                                                                                                                                                                                                                                                                                                                                                                                                                                                                                                                                                                                                                                                                                                                                                                                                                                                                                                                                                                                                                                                                                                                                                                                                                                                                                                                                                                                                                                                                                                                                                                                                                                                                                                              | 0.93 (0.92-0.94) | 1.08 (1.07-1.09) |
| Healthcare related to:                                                                                                                                                                                                                                                                                                                                                                                                                                                                                                                                                                                                                                                                                                                                                                                                                                                                                                                                                                                                                                                                                                                                                                                                                                                                                                                                                                                                                                                                                                                                                                                                                                                                                                                                                                                 |                  |                  |
| Non-Psychotic Disorder (reference= no)                                                                                                                                                                                                                                                                                                                                                                                                                                                                                                                                                                                                                                                                                                                                                                                                                                                                                                                                                                                                                                                                                                                                                                                                                                                                                                                                                                                                                                                                                                                                                                                                                                                                                                                                                                 | 1.88 (1.87-1.89) | 1.12 (1.12-1.13) |
| Psychotic Disorder (reference= no)                                                                                                                                                                                                                                                                                                                                                                                                                                                                                                                                                                                                                                                                                                                                                                                                                                                                                                                                                                                                                                                                                                                                                                                                                                                                                                                                                                                                                                                                                                                                                                                                                                                                                                                                                                     | 2.49 (2.48-2.51) | 1.11 (1.10-1.11) |
| Substance use Disorder (reference= no)                                                                                                                                                                                                                                                                                                                                                                                                                                                                                                                                                                                                                                                                                                                                                                                                                                                                                                                                                                                                                                                                                                                                                                                                                                                                                                                                                                                                                                                                                                                                                                                                                                                                                                                                                                 | 0.98 (0.97-0.99) | 1.28 (1.28-1.29) |
| Co-morbidities (reference= no)                                                                                                                                                                                                                                                                                                                                                                                                                                                                                                                                                                                                                                                                                                                                                                                                                                                                                                                                                                                                                                                                                                                                                                                                                                                                                                                                                                                                                                                                                                                                                                                                                                                                                                                                                                         |                  |                  |
| Asthma                                                                                                                                                                                                                                                                                                                                                                                                                                                                                                                                                                                                                                                                                                                                                                                                                                                                                                                                                                                                                                                                                                                                                                                                                                                                                                                                                                                                                                                                                                                                                                                                                                                                                                                                                                                                 |                  | 1.15 (1.14-1.15) |
| COPD                                                                                                                                                                                                                                                                                                                                                                                                                                                                                                                                                                                                                                                                                                                                                                                                                                                                                                                                                                                                                                                                                                                                                                                                                                                                                                                                                                                                                                                                                                                                                                                                                                                                                                                                                                                                   |                  | 1.12 (1.11-1.13) |
| Diabetes                                                                                                                                                                                                                                                                                                                                                                                                                                                                                                                                                                                                                                                                                                                                                                                                                                                                                                                                                                                                                                                                                                                                                                                                                                                                                                                                                                                                                                                                                                                                                                                                                                                                                                                                                                                               |                  | 1.10 (1.10-1.11) |
| Hypertension                                                                                                                                                                                                                                                                                                                                                                                                                                                                                                                                                                                                                                                                                                                                                                                                                                                                                                                                                                                                                                                                                                                                                                                                                                                                                                                                                                                                                                                                                                                                                                                                                                                                                                                                                                                           |                  | 1.11 (1.10-1.11) |
| Rheumatoid Arthritis                                                                                                                                                                                                                                                                                                                                                                                                                                                                                                                                                                                                                                                                                                                                                                                                                                                                                                                                                                                                                                                                                                                                                                                                                                                                                                                                                                                                                                                                                                                                                                                                                                                                                                                                                                                   |                  | 1.01 (0.99-1.04) |
| Congestive Heart Failure                                                                                                                                                                                                                                                                                                                                                                                                                                                                                                                                                                                                                                                                                                                                                                                                                                                                                                                                                                                                                                                                                                                                                                                                                                                                                                                                                                                                                                                                                                                                                                                                                                                                                                                                                                               |                  | 1.31 (1.30-1.33) |
| Chronic Liver Disease                                                                                                                                                                                                                                                                                                                                                                                                                                                                                                                                                                                                                                                                                                                                                                                                                                                                                                                                                                                                                                                                                                                                                                                                                                                                                                                                                                                                                                                                                                                                                                                                                                                                                                                                                                                  |                  | 1.11 (1.10-1.12) |
| Chronic Kidney Disease                                                                                                                                                                                                                                                                                                                                                                                                                                                                                                                                                                                                                                                                                                                                                                                                                                                                                                                                                                                                                                                                                                                                                                                                                                                                                                                                                                                                                                                                                                                                                                                                                                                                                                                                                                                 |                  | 1.34 (1.33-1.35) |
| Crohn's/Ulcerative Colitis                                                                                                                                                                                                                                                                                                                                                                                                                                                                                                                                                                                                                                                                                                                                                                                                                                                                                                                                                                                                                                                                                                                                                                                                                                                                                                                                                                                                                                                                                                                                                                                                                                                                                                                                                                             |                  | 1.15 (1.13-1.17) |
| HIV                                                                                                                                                                                                                                                                                                                                                                                                                                                                                                                                                                                                                                                                                                                                                                                                                                                                                                                                                                                                                                                                                                                                                                                                                                                                                                                                                                                                                                                                                                                                                                                                                                                                                                                                                                                                    |                  | 0.68 (0.65-0.72) |
| Skin/Soft Tissue Infections (within 1 year)                                                                                                                                                                                                                                                                                                                                                                                                                                                                                                                                                                                                                                                                                                                                                                                                                                                                                                                                                                                                                                                                                                                                                                                                                                                                                                                                                                                                                                                                                                                                                                                                                                                                                                                                                            |                  | 1.27 (1.26-1.28) |
| Chronic Pain (within 1 year)                                                                                                                                                                                                                                                                                                                                                                                                                                                                                                                                                                                                                                                                                                                                                                                                                                                                                                                                                                                                                                                                                                                                                                                                                                                                                                                                                                                                                                                                                                                                                                                                                                                                                                                                                                           |                  | 1.23 (1.22-1.24) |
| <p>CHC: Community Health Centre; No.: number; Residential Instability, Material Deprivation, Dependency, Ethnic Concentration drawn from ONMarg; Recent Immigrant Status: Presence in IRCC database with landing date less than 10 years before index date; Rural: resides in a rural area as defined as a settlement of &lt;10,000 individuals; Psychotic Disorder, Non-psychotic disorder, Substance use Disorder includes any hospitalization or 2 claims in 2 years or less of any related diagnostic or fee code; COPD: chronic obstructive pulmonary disease; HIV: human immunodeficiency virus.</p> <p><sup>1</sup>Variables adjusted for in psychiatric care model: age, sex, income quintile, resident instability, material deprivation, dependency, ethnic concentration, recent immigrant status, rural, mental health-related healthcare, CHC usage in 3 years, rostered to family physician at index (clustering of family physician at index was accounted for).</p> <p><sup>2</sup>Variables adjusted for in emergency department visit model: age, sex, income quintile, resident instability, material deprivation, dependency, ethnic concentration, recent immigrant status, rural, mental health-related healthcare, CHC usage in 3 years, rostered to family physician at index (clustering of family physician at index was accounted for), comorbidities in last 3 years prior to the index date (ie, Chronic Liver Disease, Chronic Kidney Disease, Crohn's/Ulcerative Colitis, Rheumatoid Arthritis, Infective Endocarditis,) any diagnosis of comorbidity that prior to index date (ie, Asthma, COPD, Diabetes, Hypertension, Congestive heart failure, HIV), comorbidities in last 1 year prior to the index date (ie, Skin and Soft Tissue Infections, Chronic Pain).</p> |                  |                  |
